# Supplementary material
Source: PubMed Central journal article supplement (PMC515113)

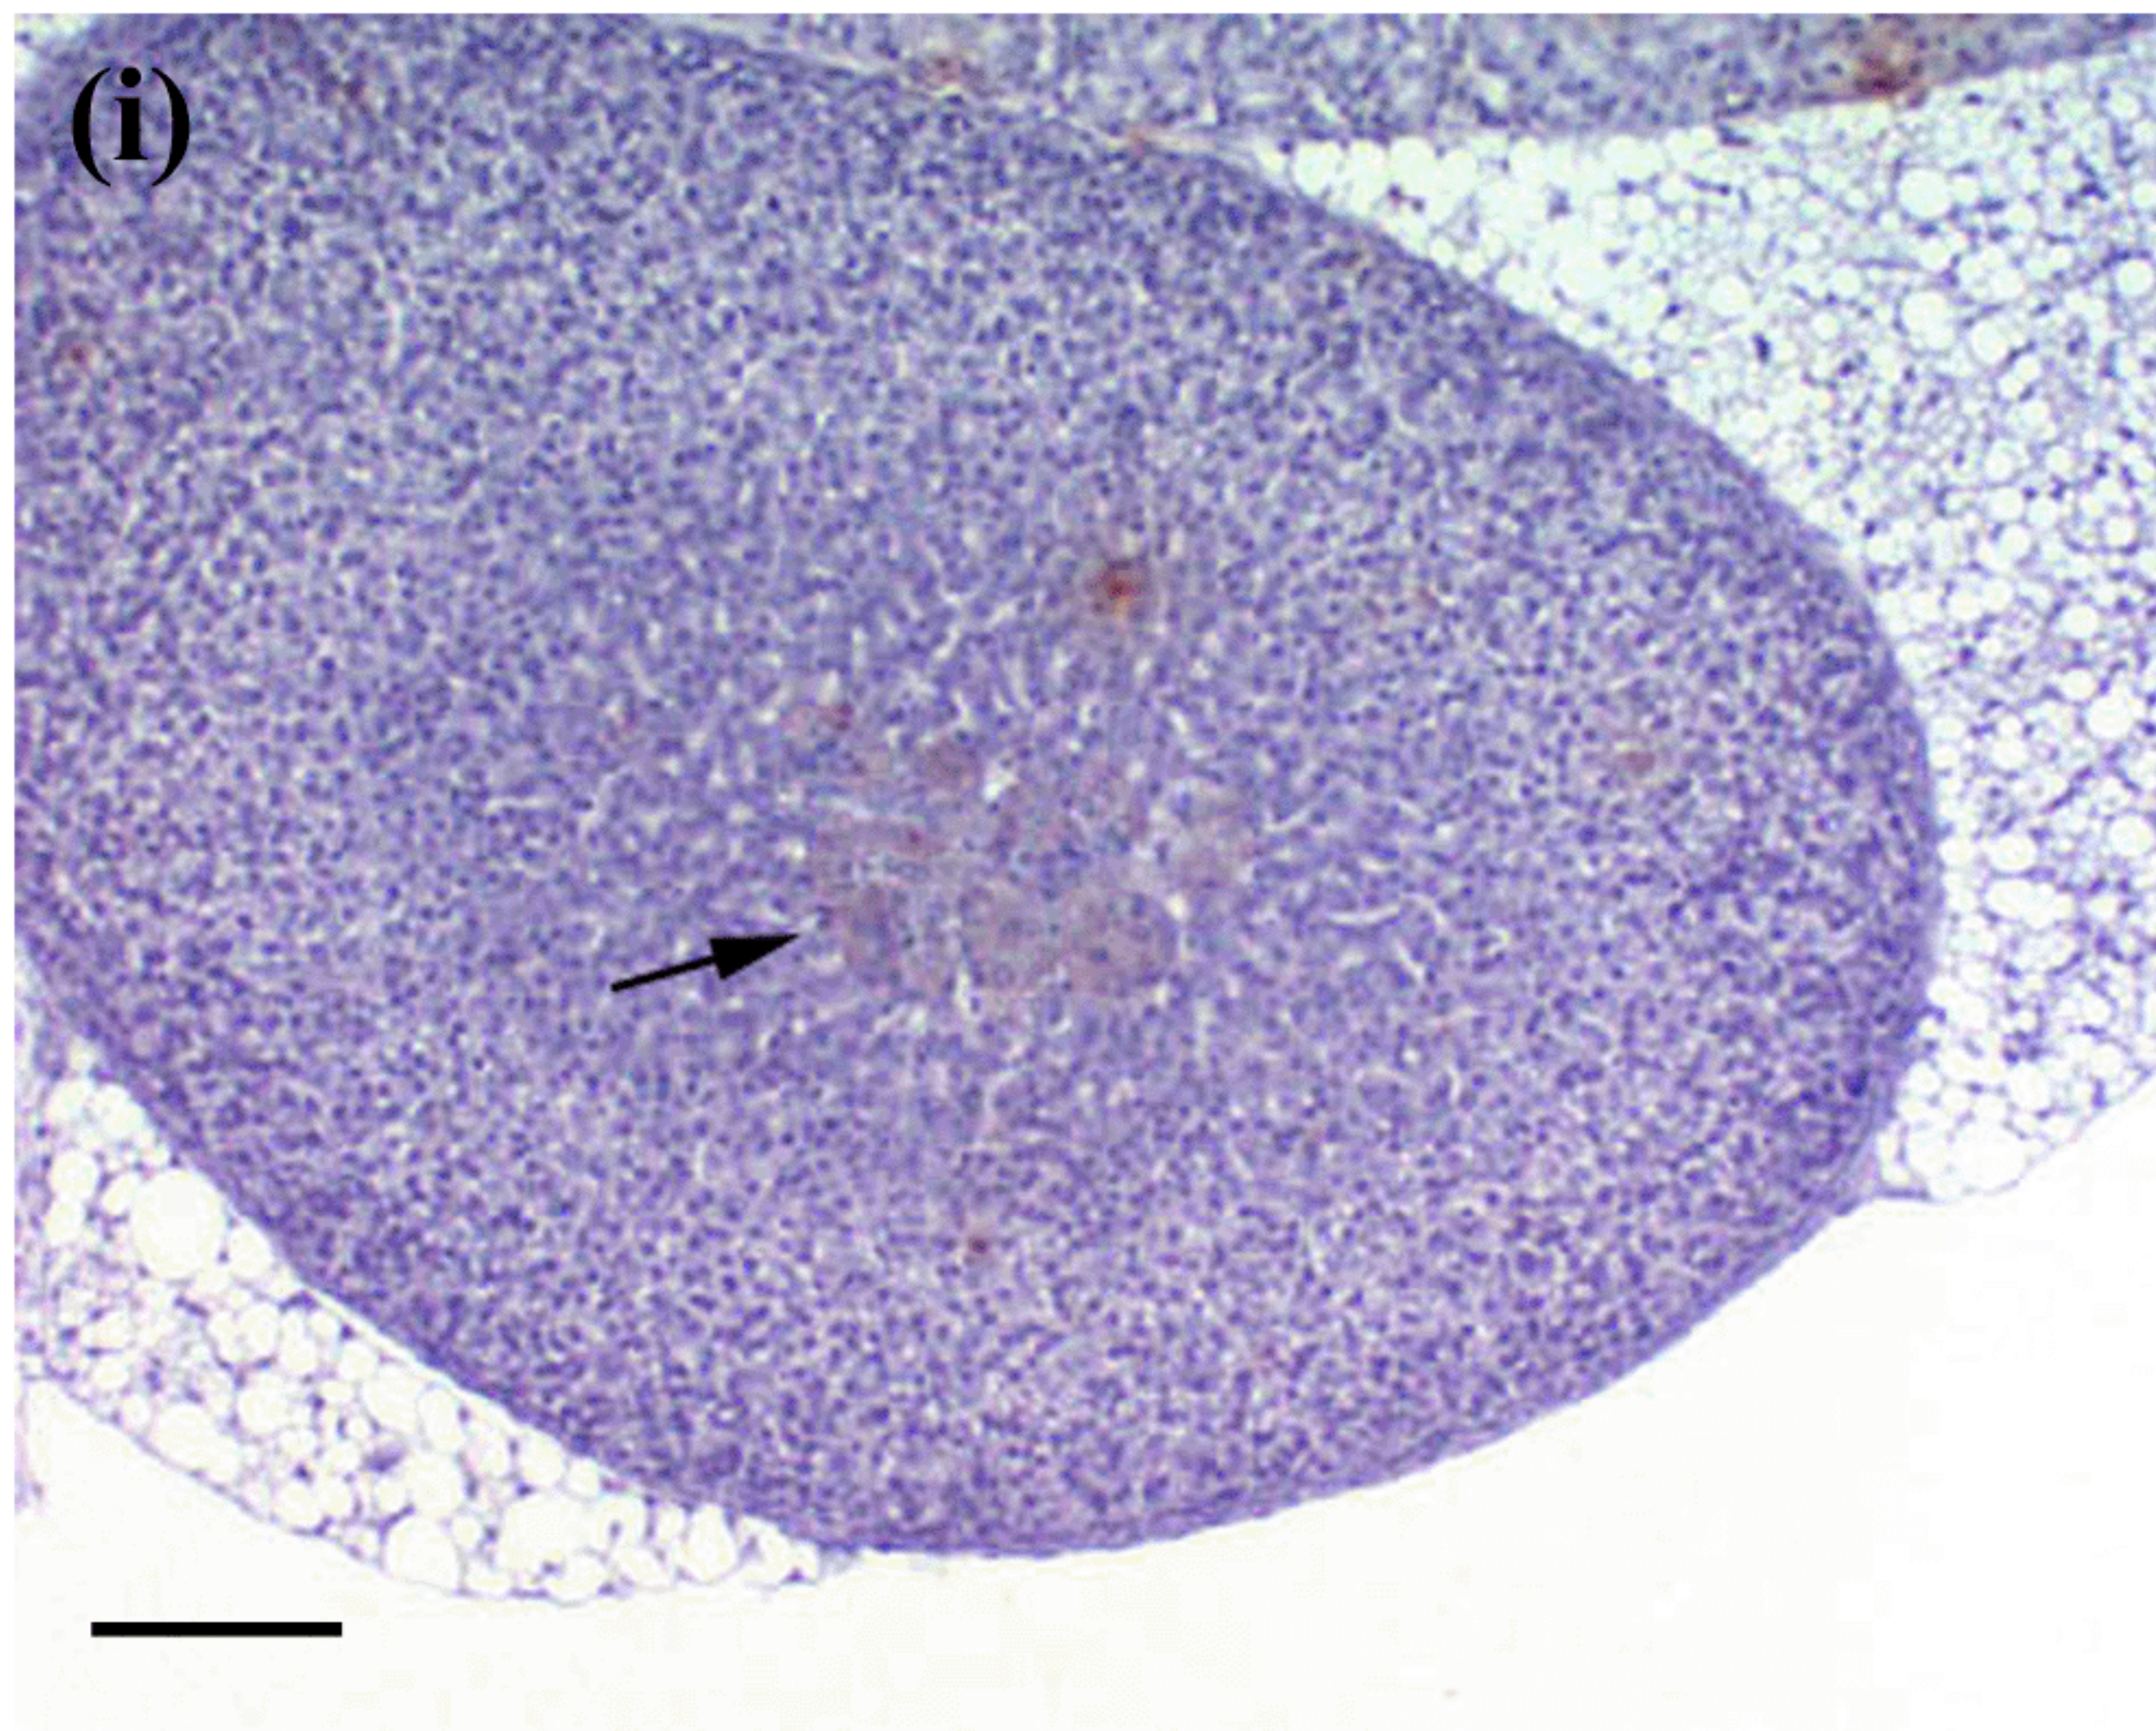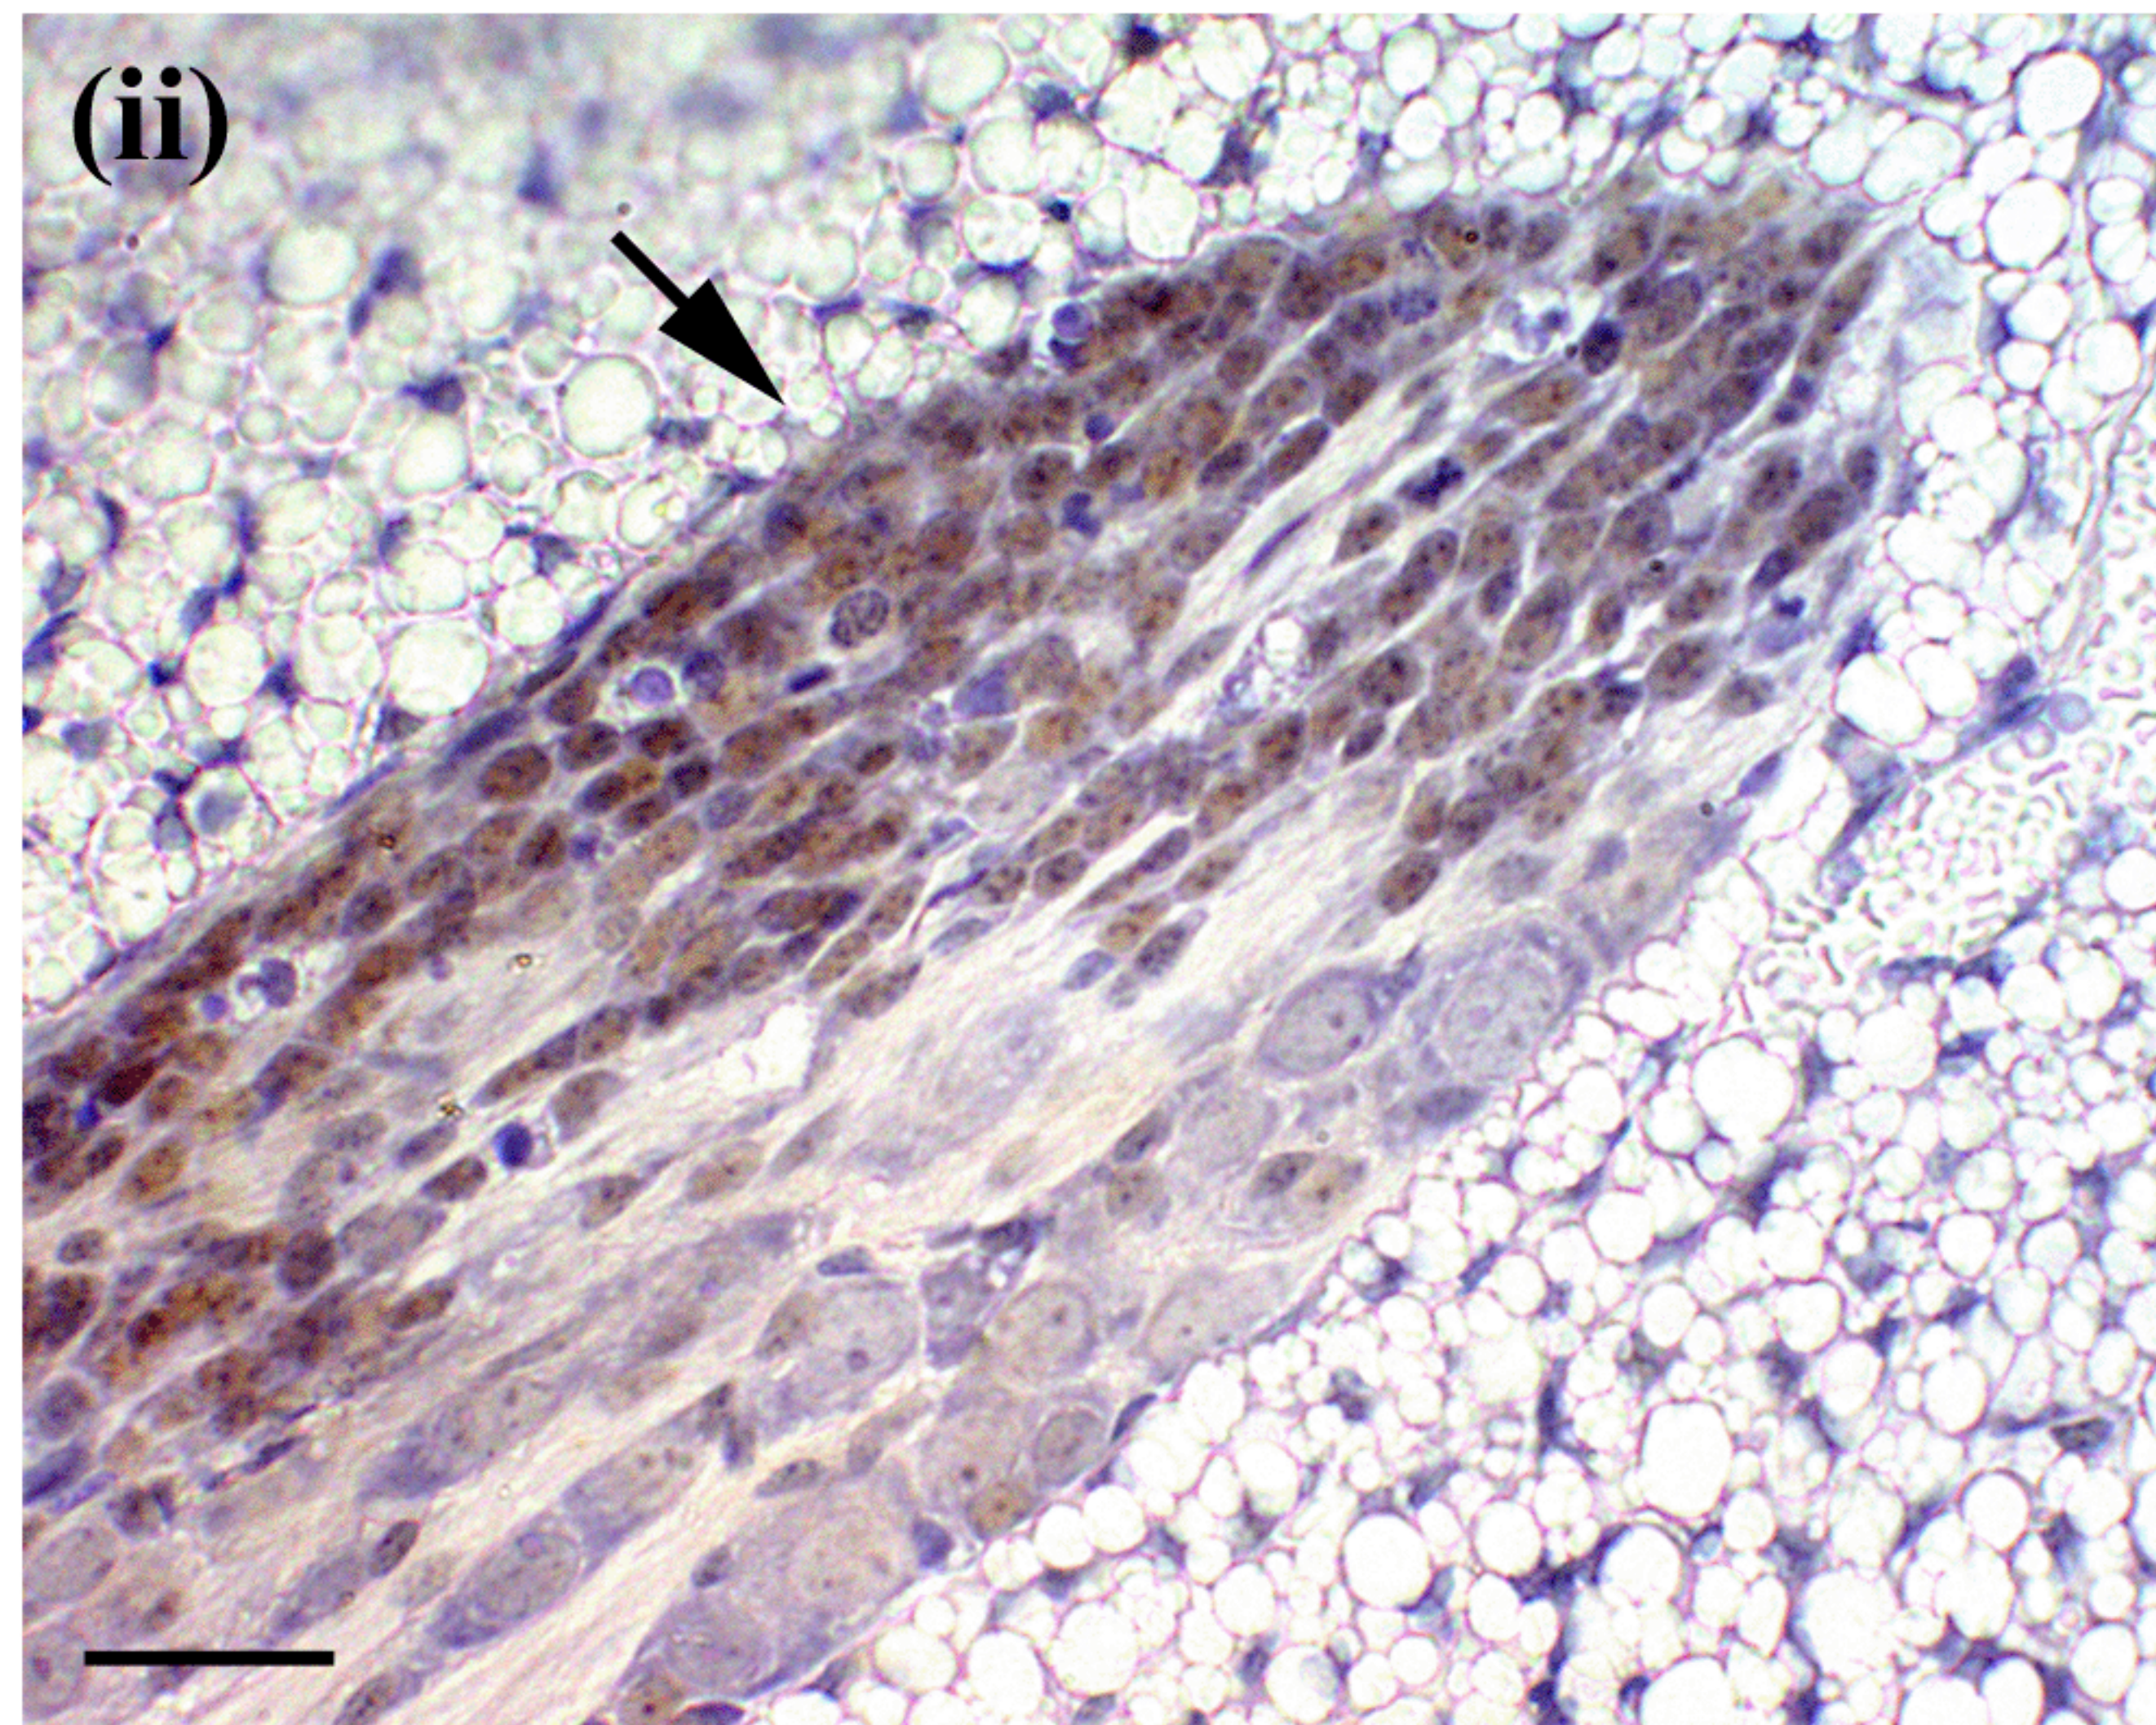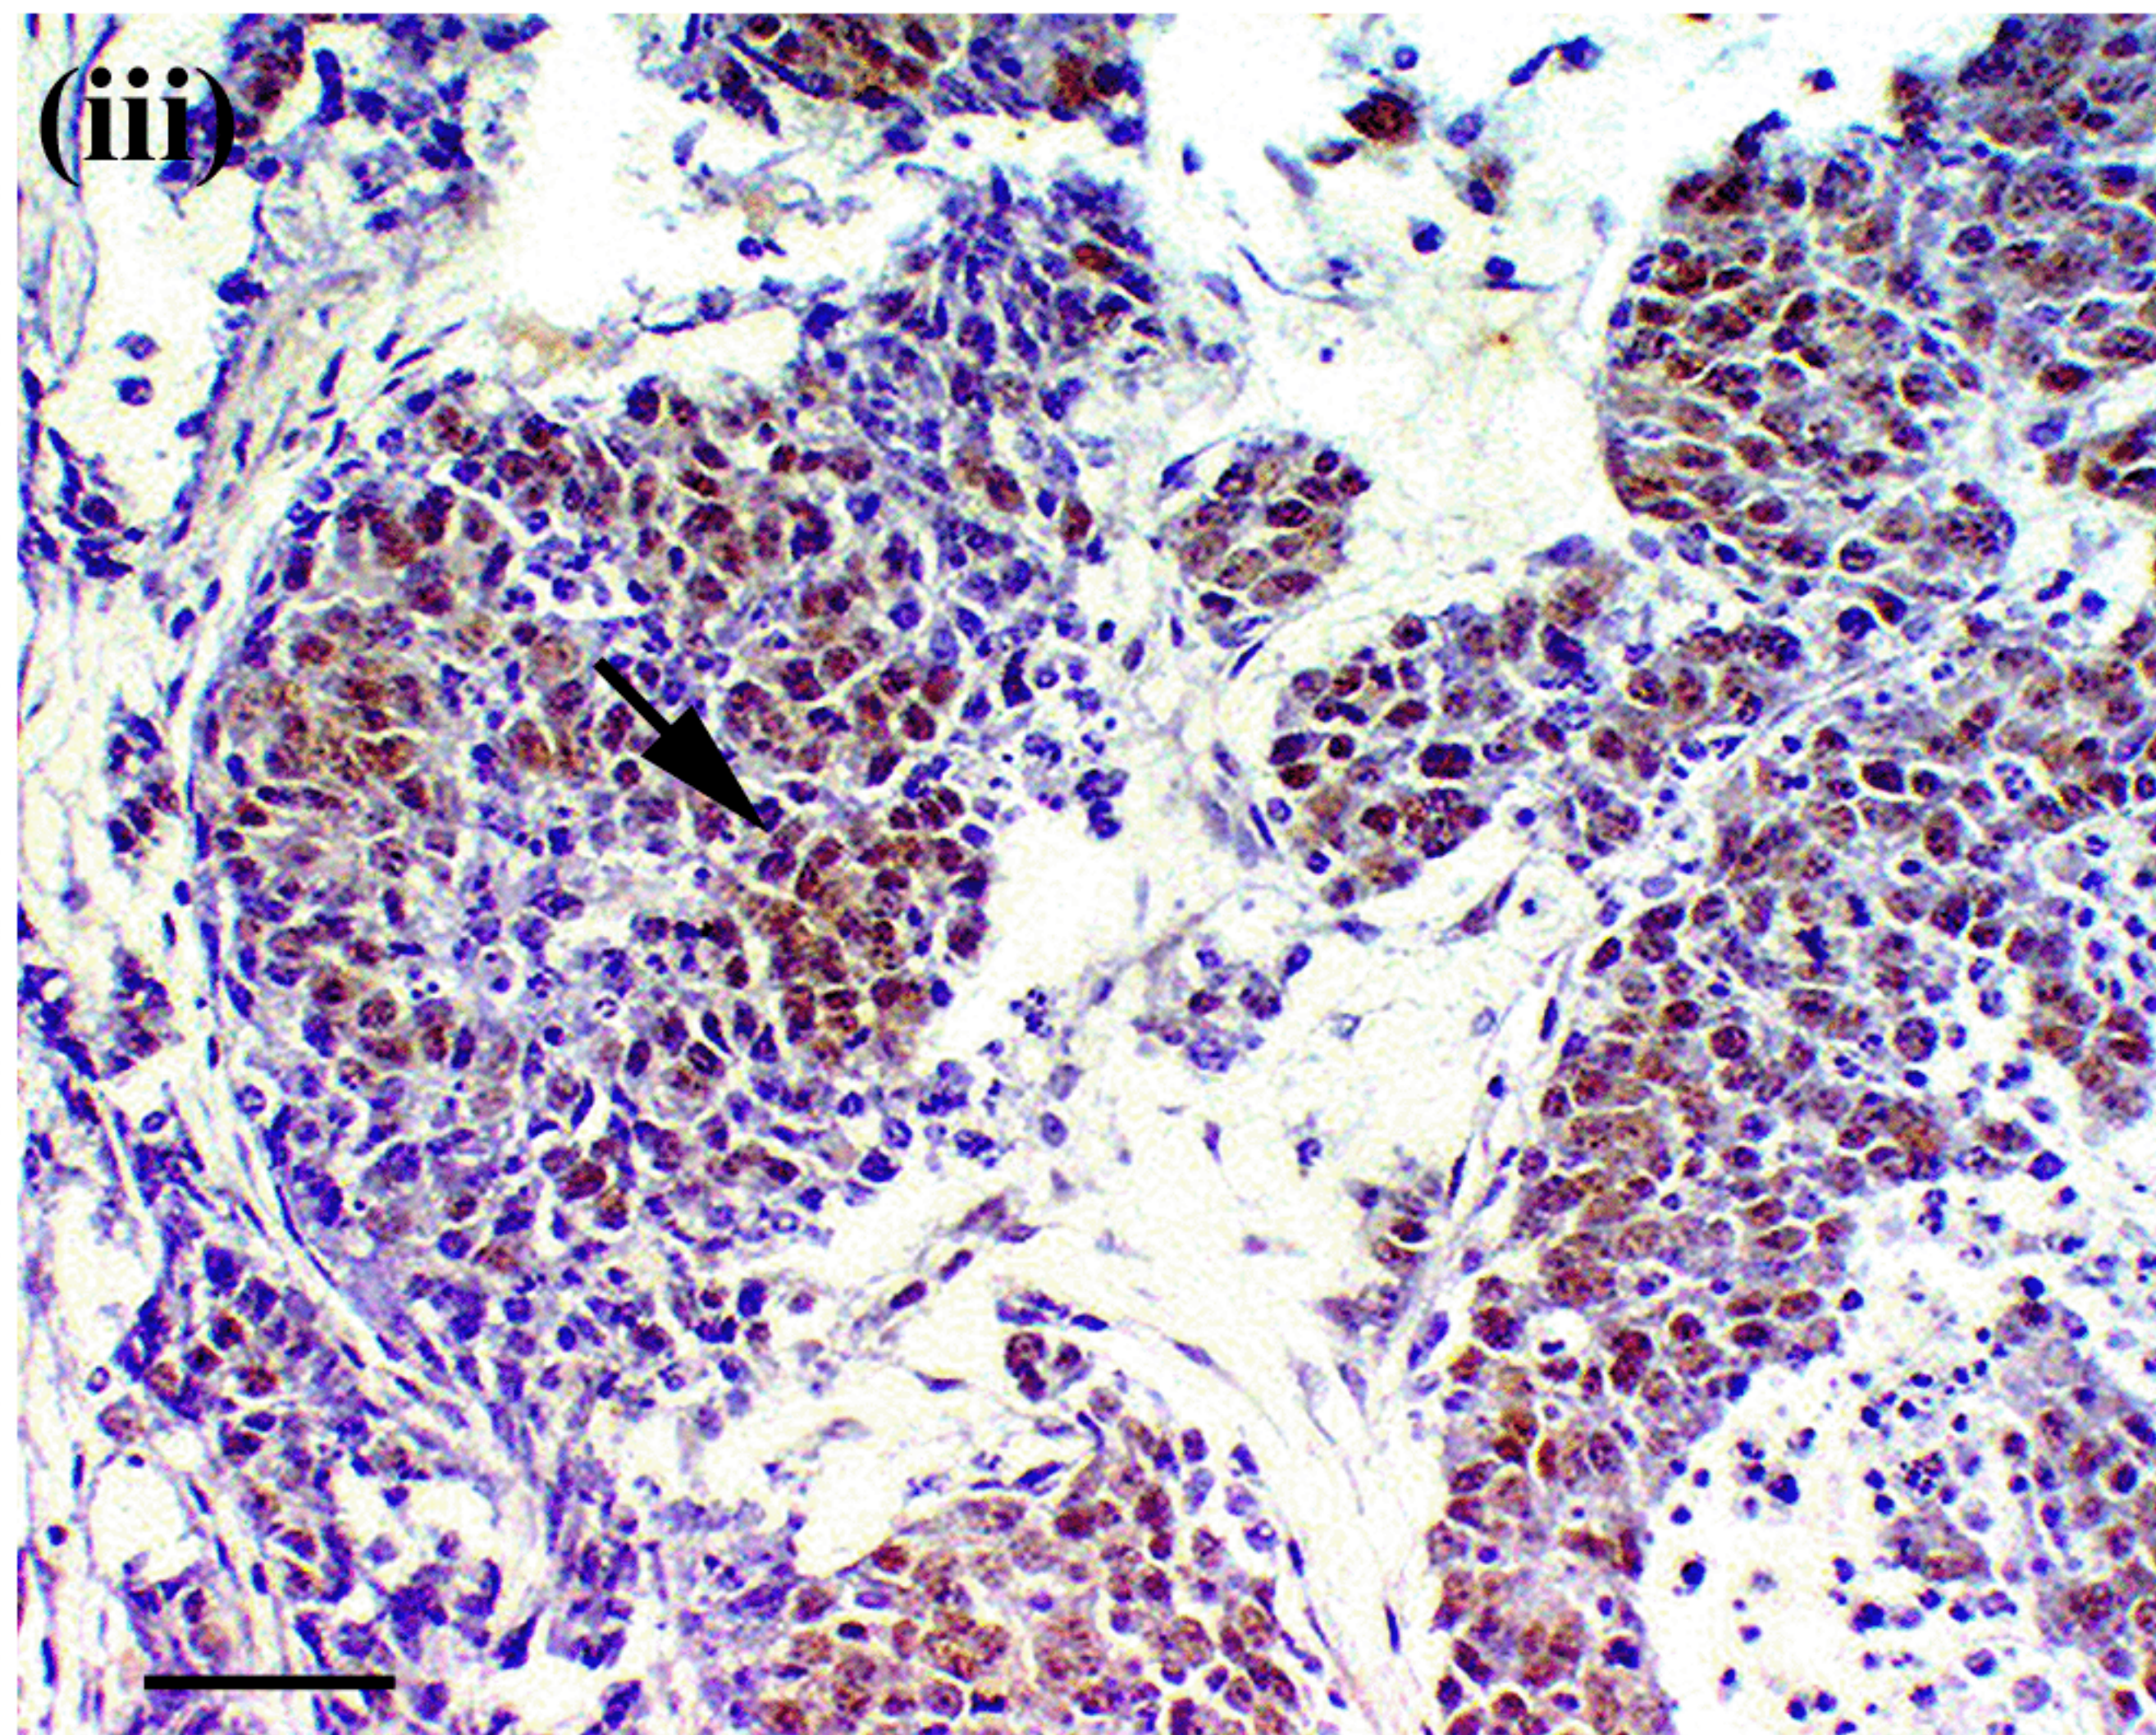

Supplement: pnas_101_34_12664__1.pdf [file pnas_101_34_12664__1.pdf]

(i) *MYCN* transgene copies in metaphase cells in hemizygous mice (2wks)

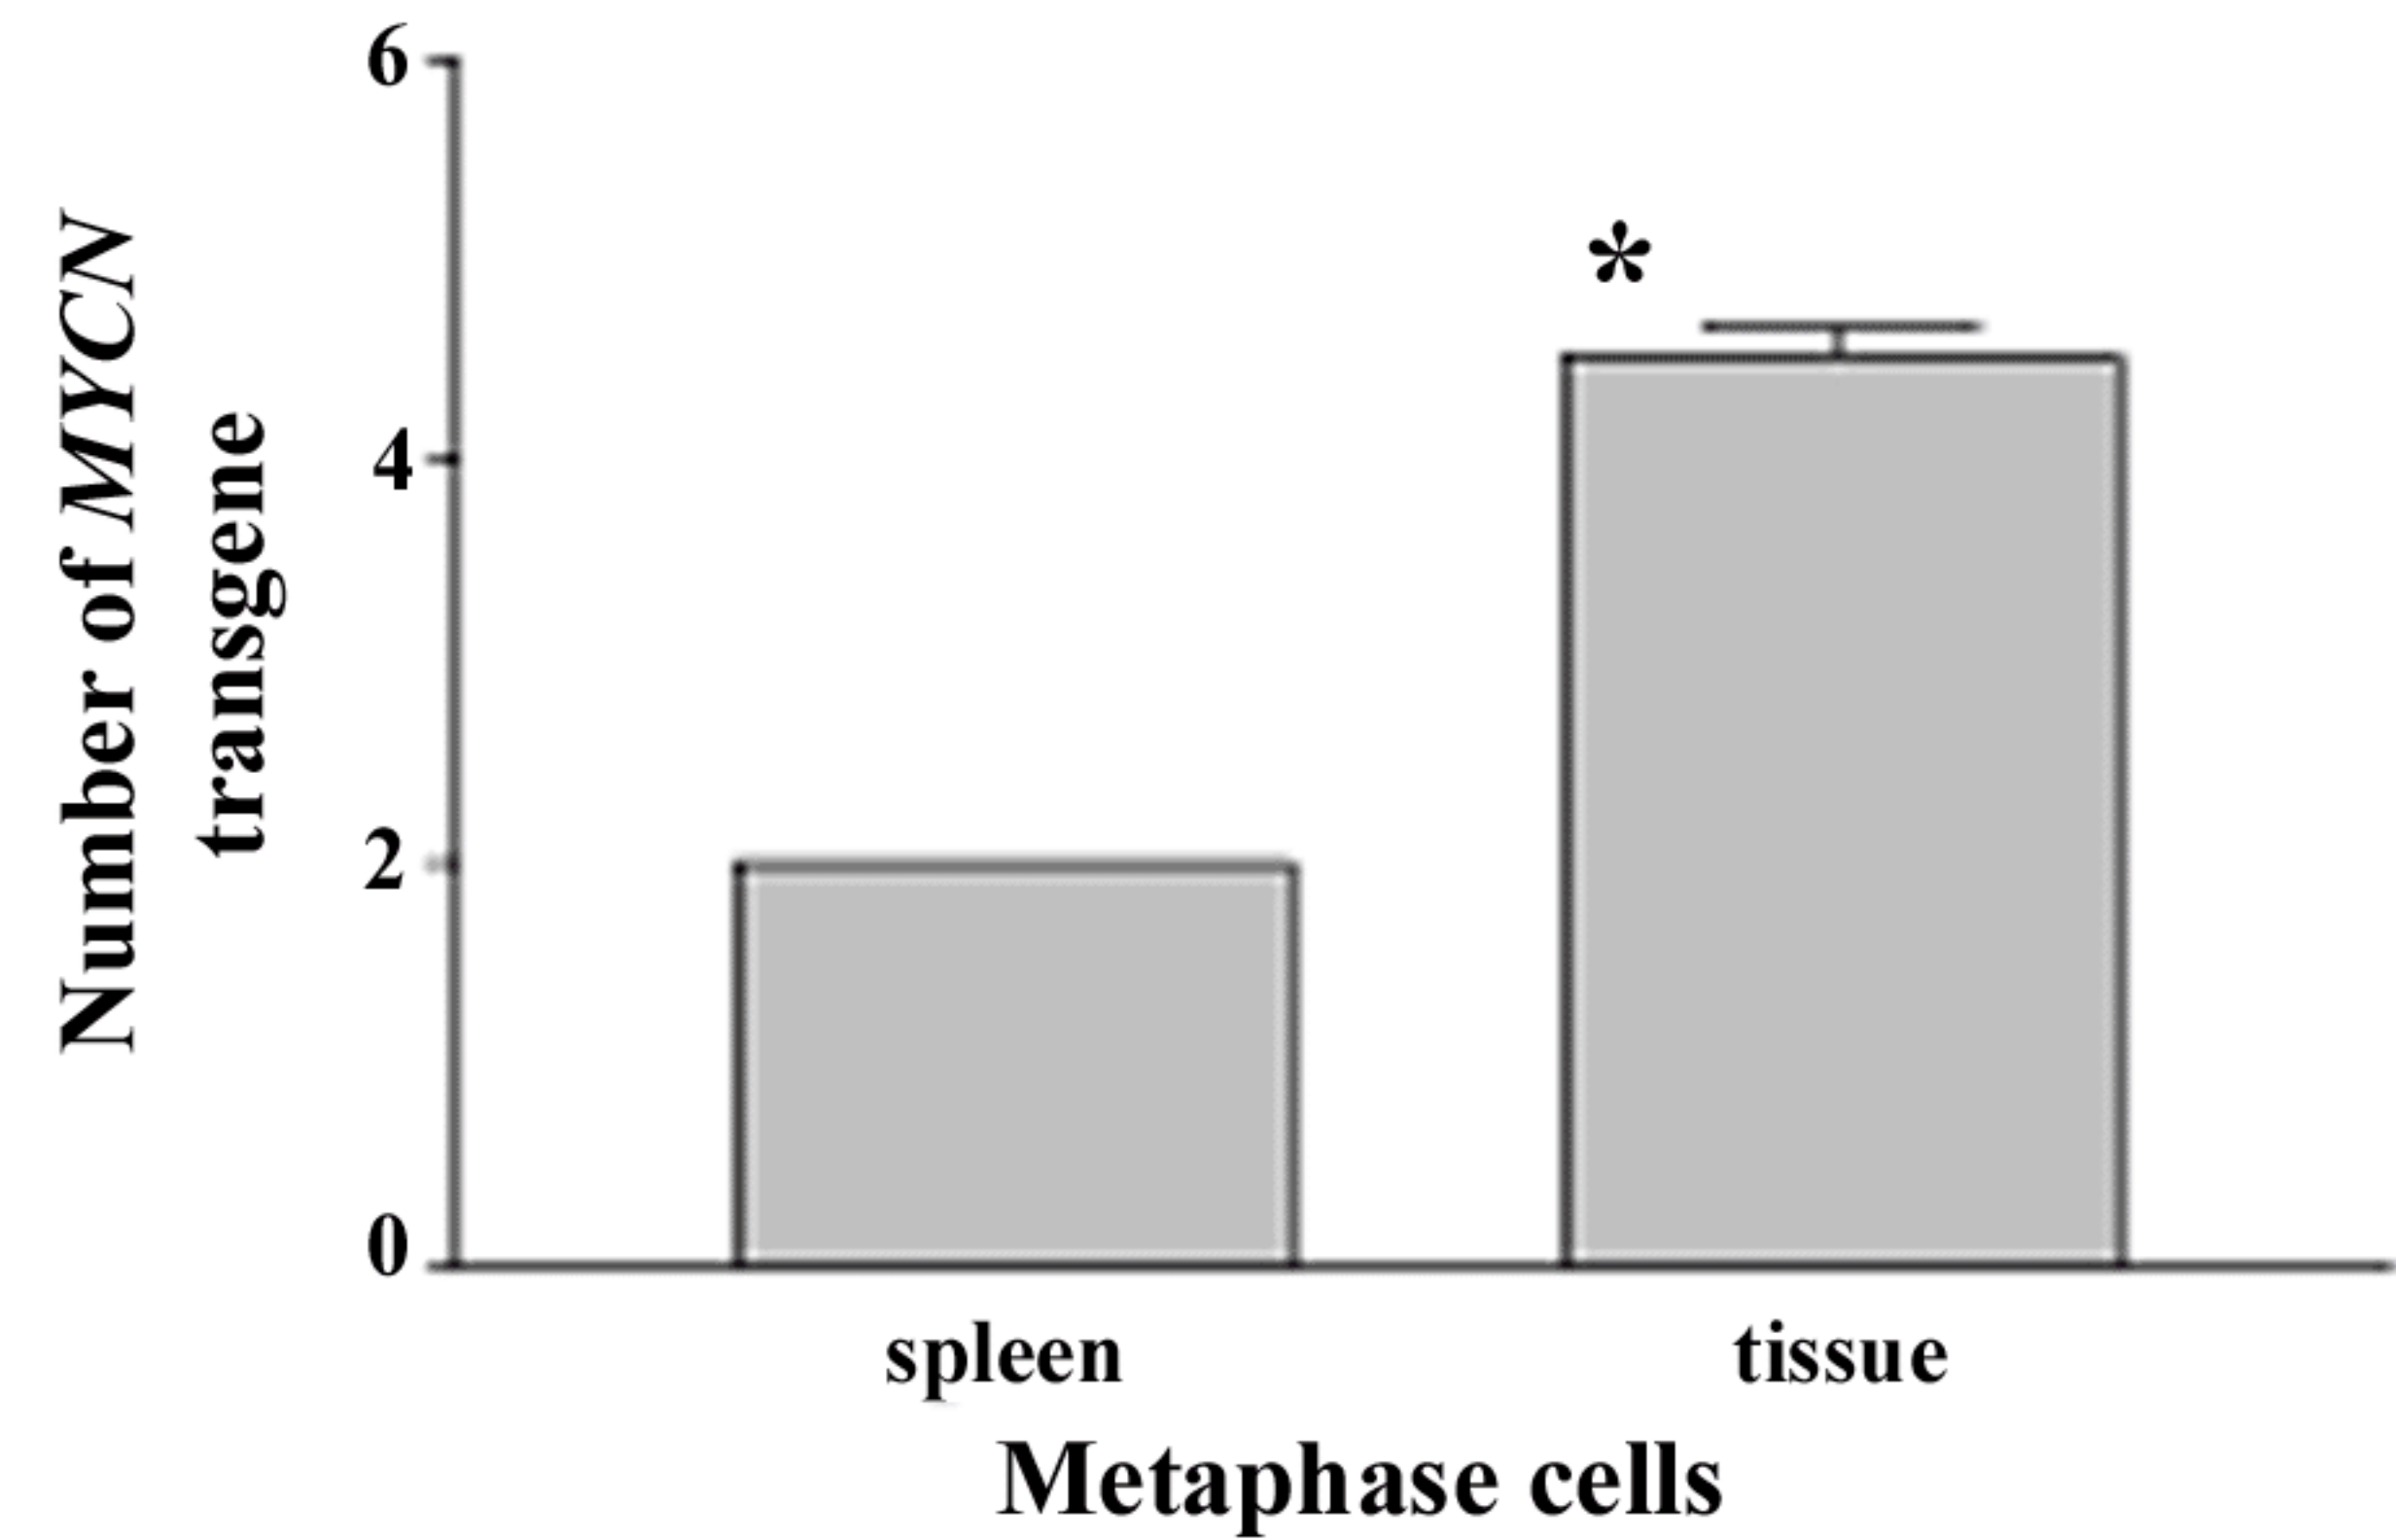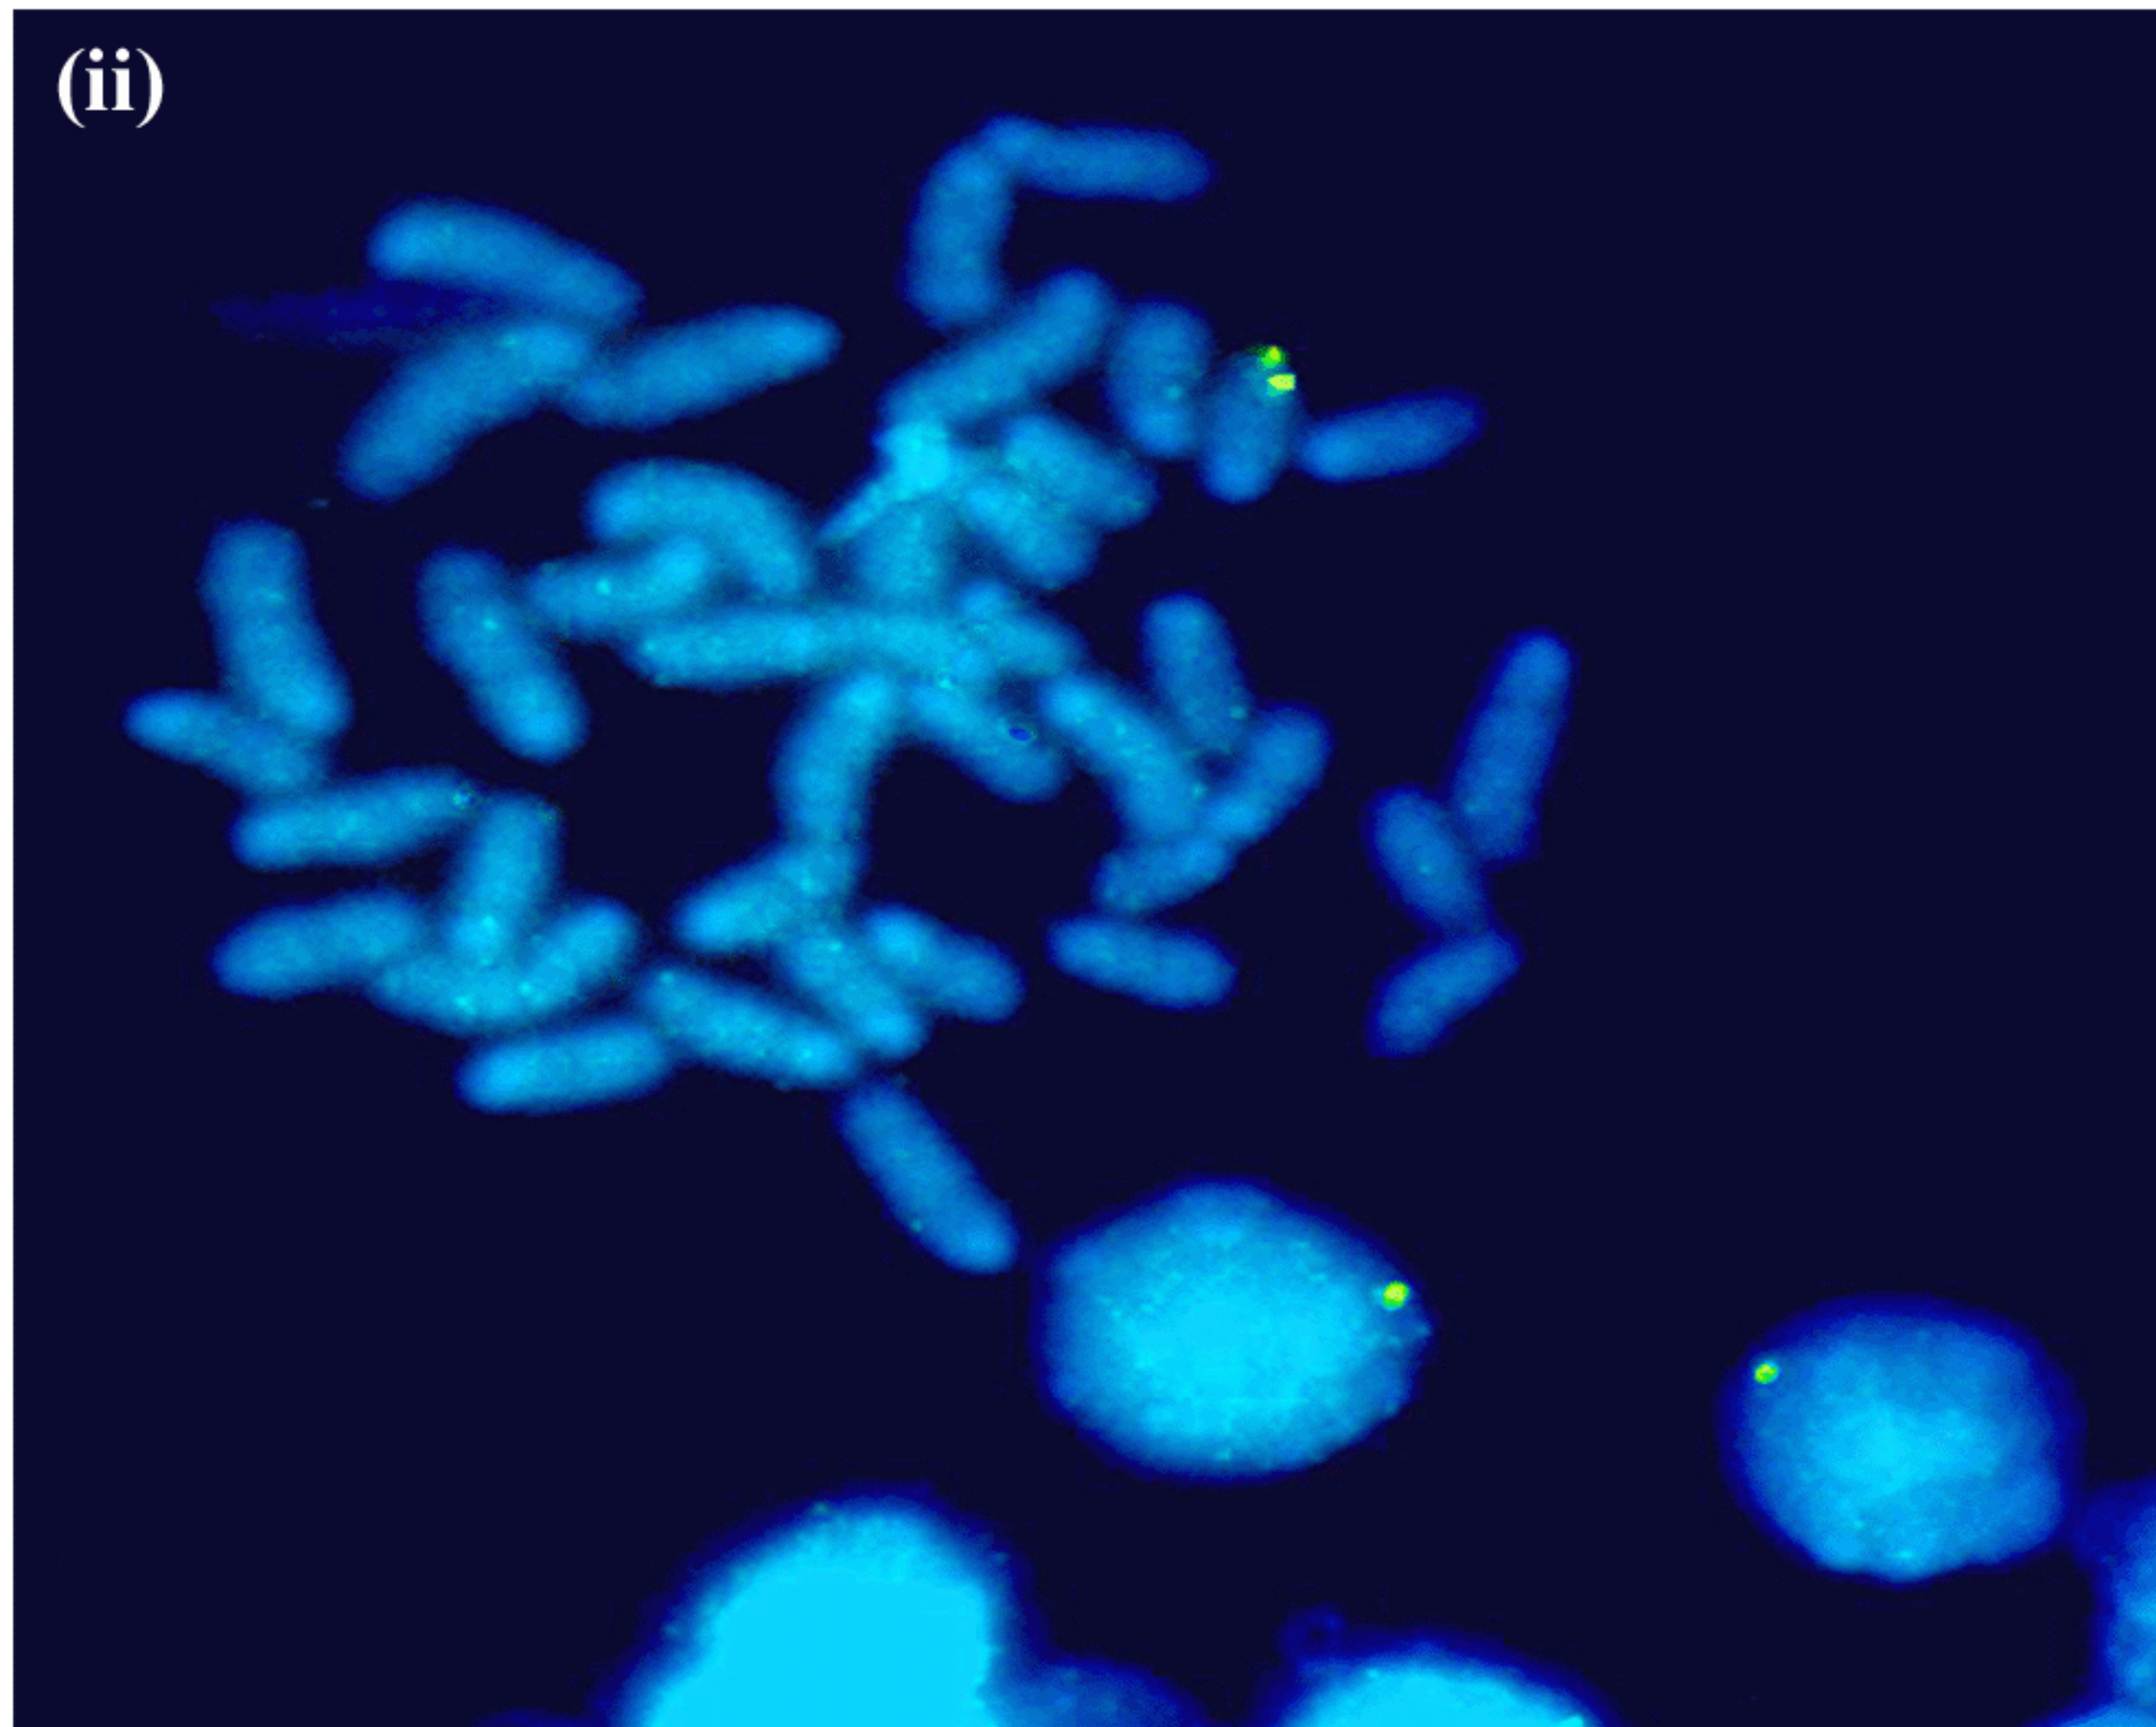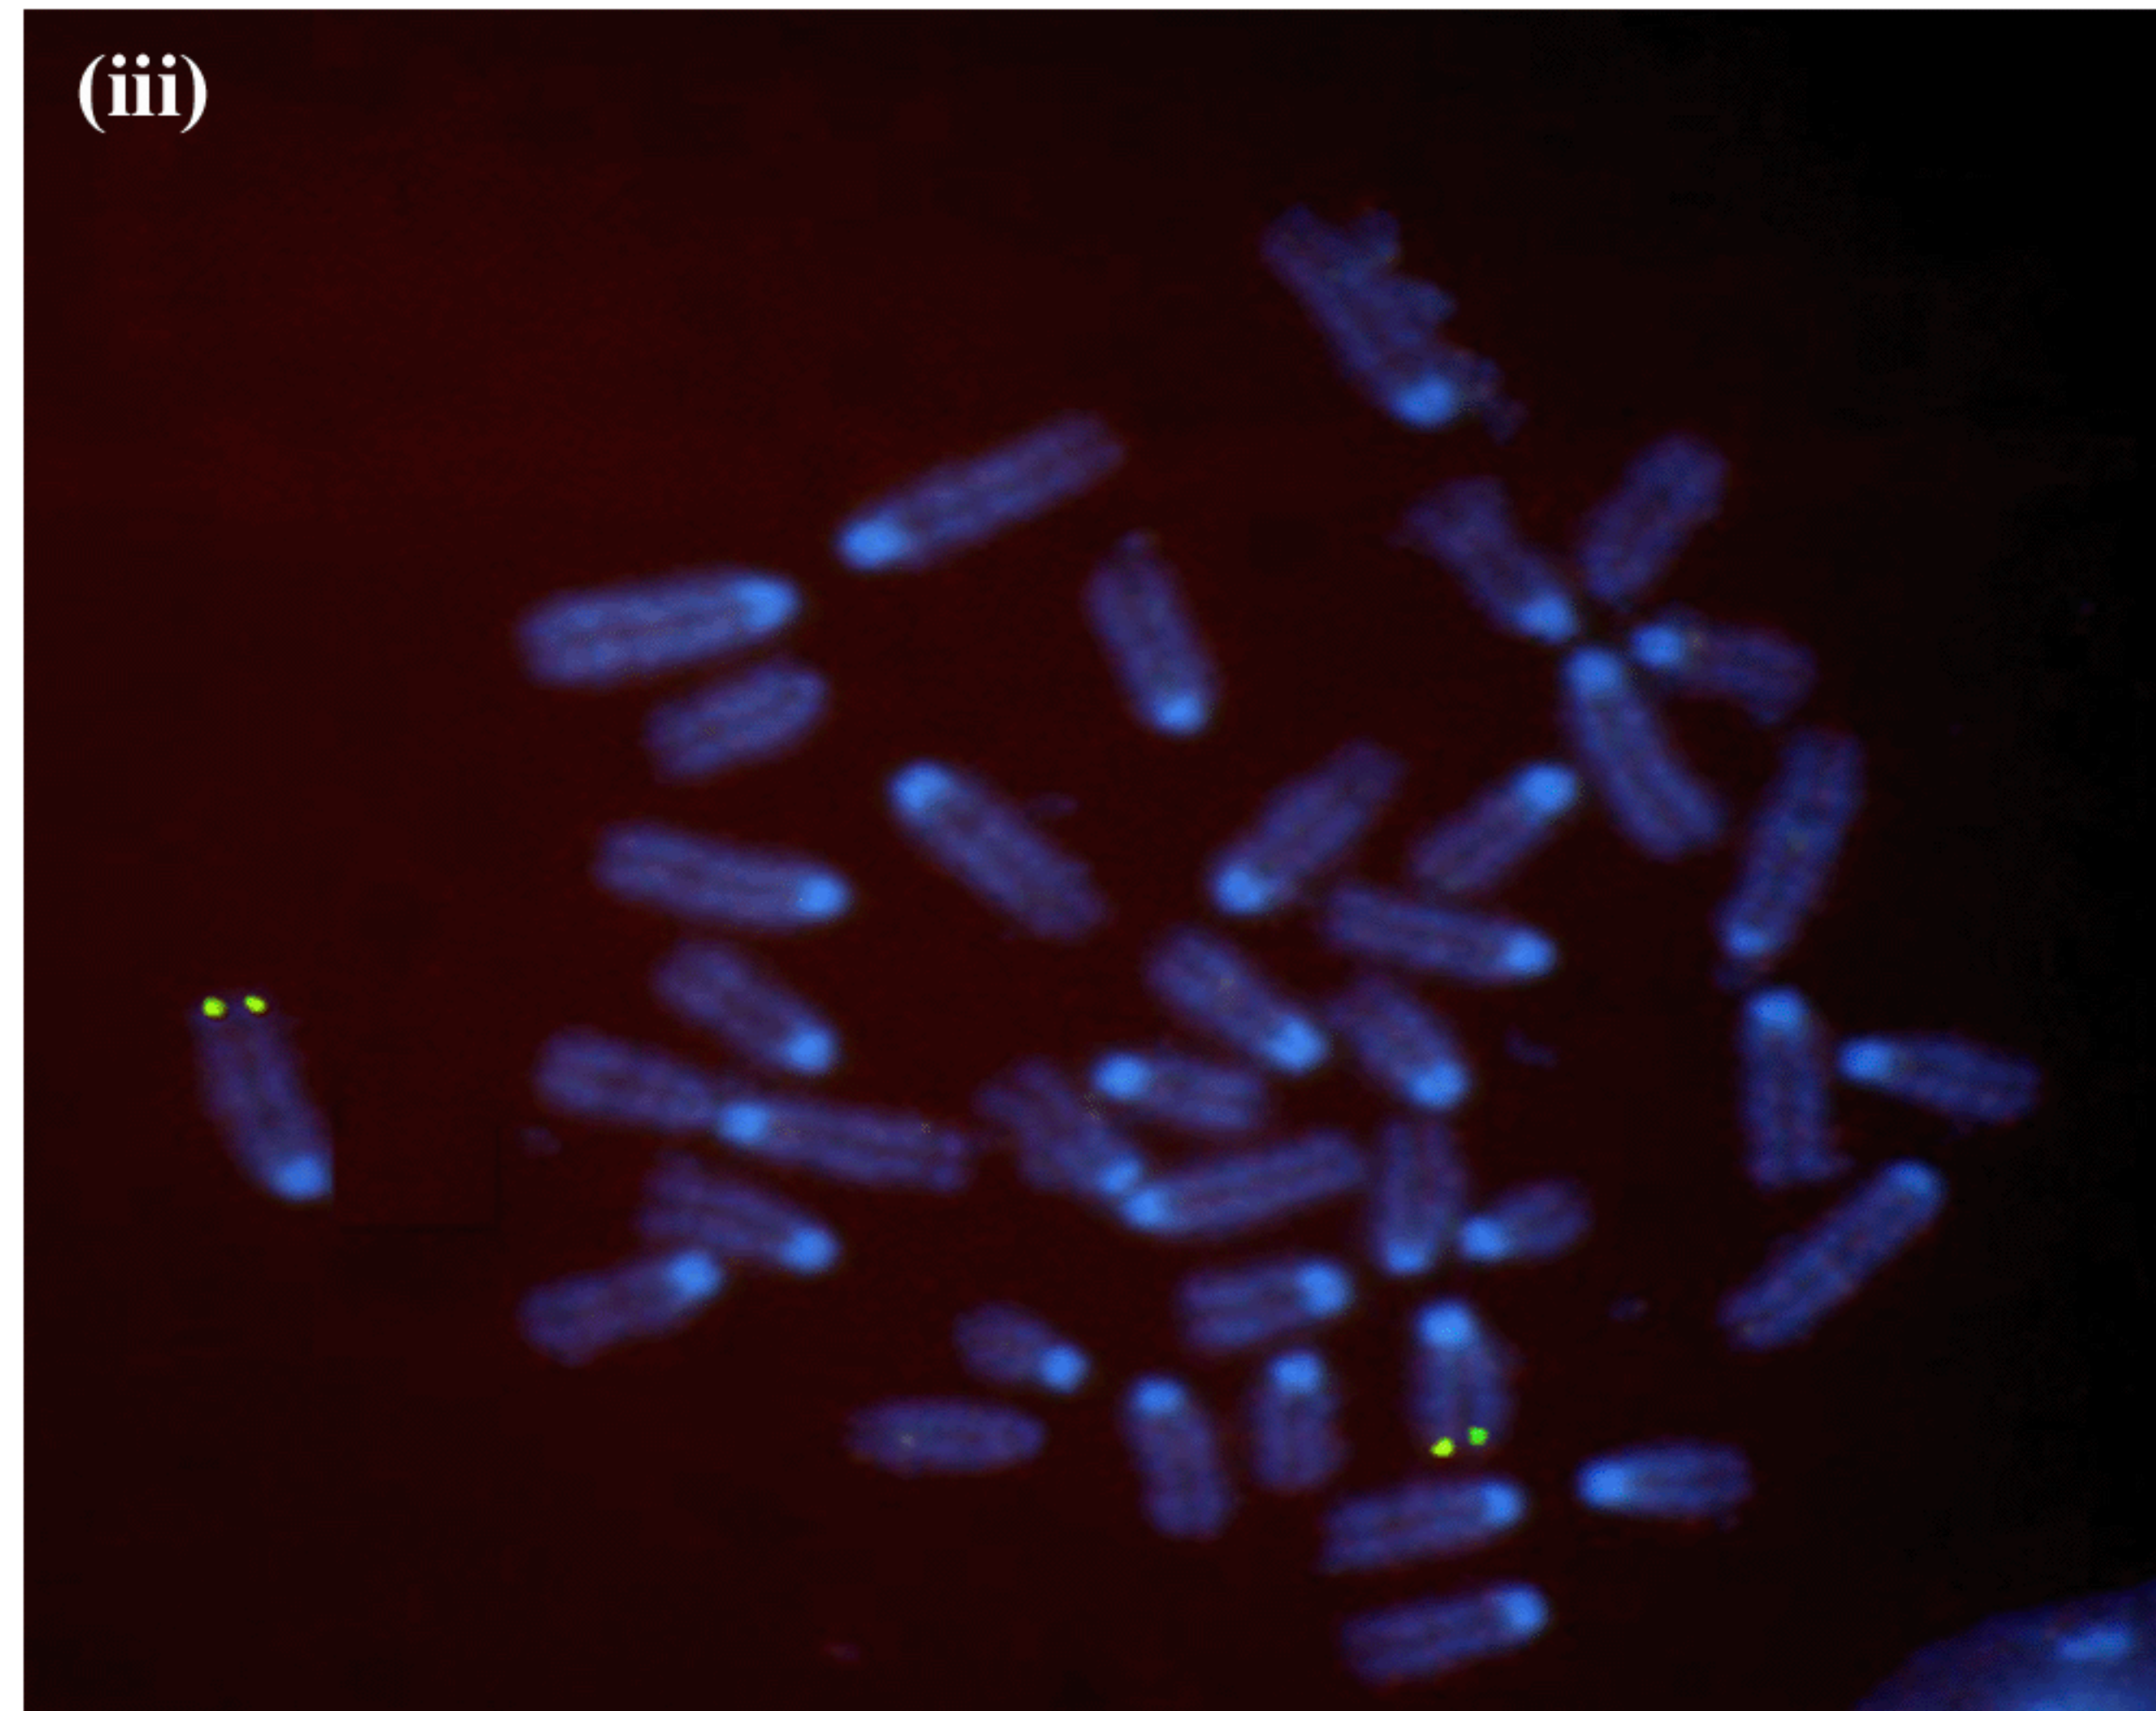

Supplement: pnas_101_34_12664__2.pdf [file pnas_101_34_12664__2.pdf]
